# Supplementary material
Source: PubMed Central journal article supplement (PMC8656917)
Supplement: jcsm.9262.ds001.pdf [file jcsm.9262.ds001.pdf]

**Table S1:** Description of craniofacial features evaluated among the sample.

| Measurement                | Description                                                                                                                                                                                                                                                               |
|----------------------------|---------------------------------------------------------------------------------------------------------------------------------------------------------------------------------------------------------------------------------------------------------------------------|
| Cephalometric measurements |                                                                                                                                                                                                                                                                           |
| SNA angle                  | The angle between the sella-nasion (SN) and nasion-subspinal (NA) lines. This measurement assesses the degree of maxillary protrusion in relation to the cranial base.                                                                                                    |
| SNB angle                  | The angle between the sella-nasion (SN) and nasion-subramental (NB) lines. This measurement assesses the degree of mandible protrusion in relation to the cranial base.                                                                                                   |
| ANB angle                  | The angle represented by the intersection between the nasion-subspinal (NA) and nasion-supramental lines and corresponding to the difference between the SNA and SNB angles. This measurement assesses the anteroposterior relationship between the maxilla and mandible. |
| FMA angle                  | Angular measurement between the Frankfort plane (from porion to orbitale) and the mandibular plane (from menton to gonion). This measurement assesses the mandibular growth direction.                                                                                    |
| Photo evaluation           |                                                                                                                                                                                                                                                                           |
| Facial profile             | Visually categorized as straight, concave or convex.                                                                                                                                                                                                                      |
| Vertical proportion        | Visually categorized as brachyfacial, mesofacial or dolichofacial.                                                                                                                                                                                                        |

**Table S2:** Intra-examiner reliability for the craniofacial measurements

| Variables           | Agreement                      |
|---------------------|--------------------------------|
| SNA                 | 0.98 (0.96, 0.99) <sup>a</sup> |
| SNB                 | 0.99 (0.93, 0.99) <sup>a</sup> |
| ANB                 | 0.97 (0.96, 0.99) <sup>a</sup> |
| FMA                 | 0.98 (0.97, 0.99) <sup>a</sup> |
| Facial profile      | 0.83 (0.11) <sup>b</sup>       |
| Vertical proportion | 0.86 (0.15) <sup>b</sup>       |

<sup>a</sup>Intra-class correlation and 95% CI; <sup>b</sup>Cohen's Kappa coefficient and standard error.

**Table S3:** Intra-examiner reliability for the craniofacial measurements

| OSA status           | Mouth breathing | n  | MCW Mean±SD | p-value            |
|----------------------|-----------------|----|-------------|--------------------|
| Diagnosed OSA        | Absent          | 18 | 2.73±0.51   | 0.221 <sup>a</sup> |
|                      | Present         | 30 | 2.69±0.60   |                    |
| At high-risk for OSA | Absent          | 14 | 2.70±0.34   |                    |
|                      | Present         | 42 | 3.04±0.34   |                    |
| At low-risk for OSA  | Absent          | 19 | 3.25±0.66   | 0.592 <sup>b</sup> |
|                      | Present         | 26 | 3.04±0.34   |                    |
| Total                | Absent          | 51 | 2.92±0.59   |                    |
|                      | Present         | 98 | 2.86±0.51   |                    |

SD= Standard deviation; <sup>a</sup>interaction between OSA status and Mouth breathing, two-way ANOVA; <sup>b</sup>one-way ANOVA.
